# Supplementary material for: Massive corals record deforestation in Malaysian Borneo through sediments in river discharge
Source: Copernicus journal article supplement (doi:10.5194/bg-2022-235), 2023-01-04
Supplement: Supplementary file 1 [file bg-2022-235-supplement.pdf]

## Supplementary information

| Station          | Distance from river mouth<br>[km] | SSS  | Ba/Ca [ $\mu\text{mol mol}^{-1}$ ] |
|------------------|-----------------------------------|------|------------------------------------|
| Anemone's Garden | 22                                | 32.3 | 4.41                               |
| Eve's Garden     | 12                                | 32.3 | 4.38                               |
| S1               | 10                                | 32.3 | 4.47                               |
| S2               | 8                                 | 32.1 | 4.73                               |
| S3               | 6                                 | 32.8 | 4.7                                |
| S4               | 4                                 | 32.7 | 4.73                               |
| S5               | 2                                 | 19.2 | 17.68                              |
| S6               | 0                                 | 7.8  | 59.58                              |

**Table S1:** Distance from river mouth, sea surface salinity and Ba/Ca ratio of each seawater sample (average of duplicates) on the transect between Anemone's Garden and the Miri River's mouth.

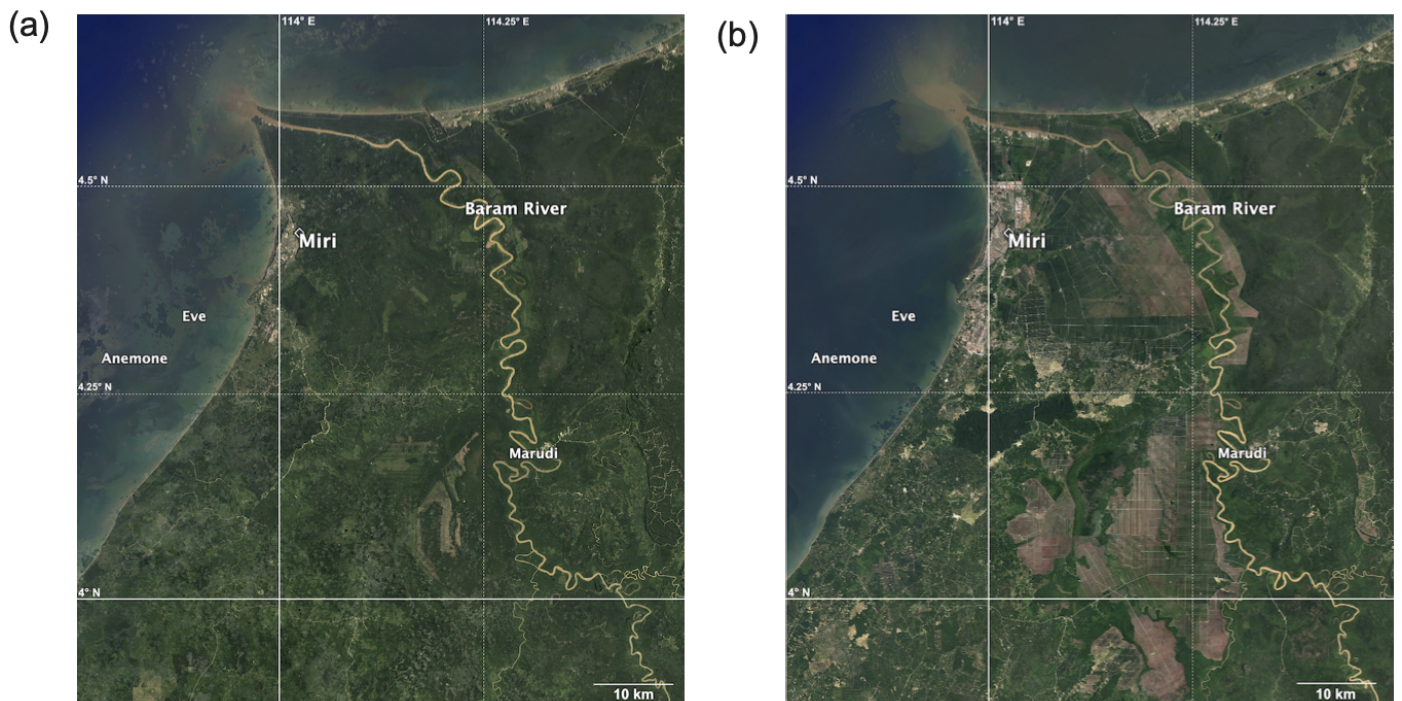

**Figure S1:** Satellite images of the study site and surrounding region in (a) 1990 and in (b) 2019 (Data SIO, NOAA, U.S. Navy, GEBCO. Image: Landsat/Copernicus). Notice the forest surface cover difference south of the Baram River and increase in anthropogenic land use (plantations).

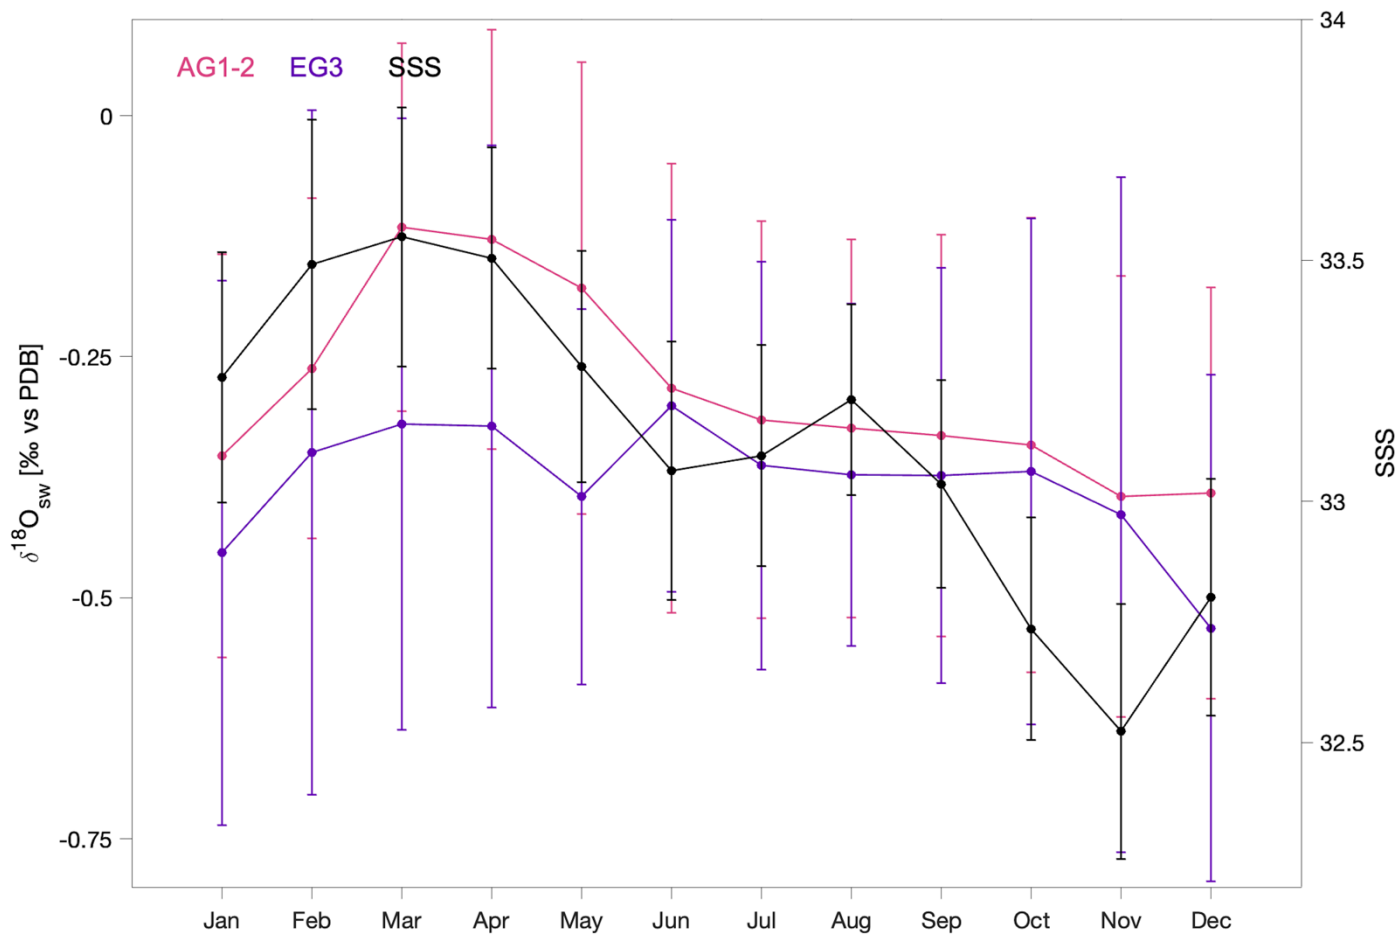

Figure S2: Monthly averages of  $\delta^{18}\text{O}_{\text{sw}}$  in pink (AG1-2) and purple (EG3) and SSS in black. Monthly standard deviations shown as error bars.

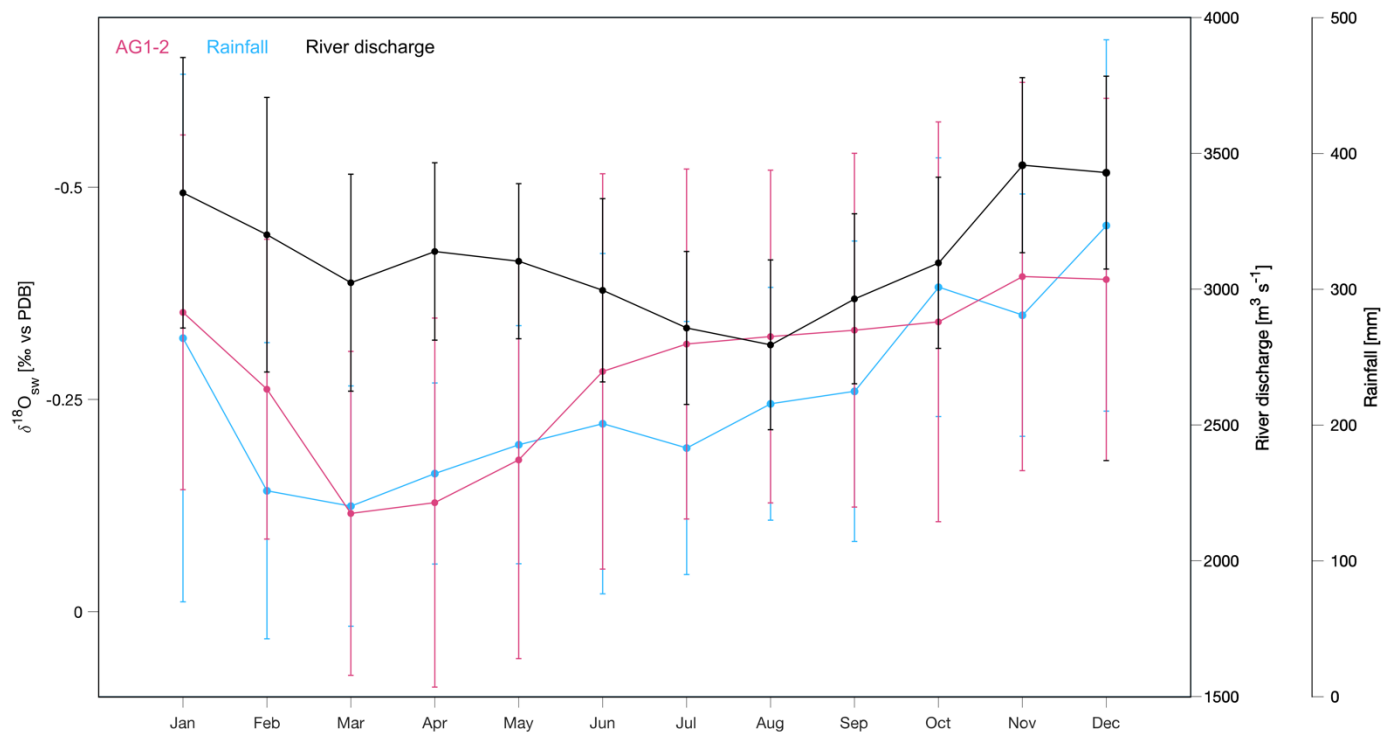

Figure S3: Monthly averages of  $\delta^{18}\text{O}_{\text{sw}}$  in pink (AG1-2), rainfall in blue and river discharge in black. Monthly standard deviations shown as error bars. Note that the y axis on the left is reversed.

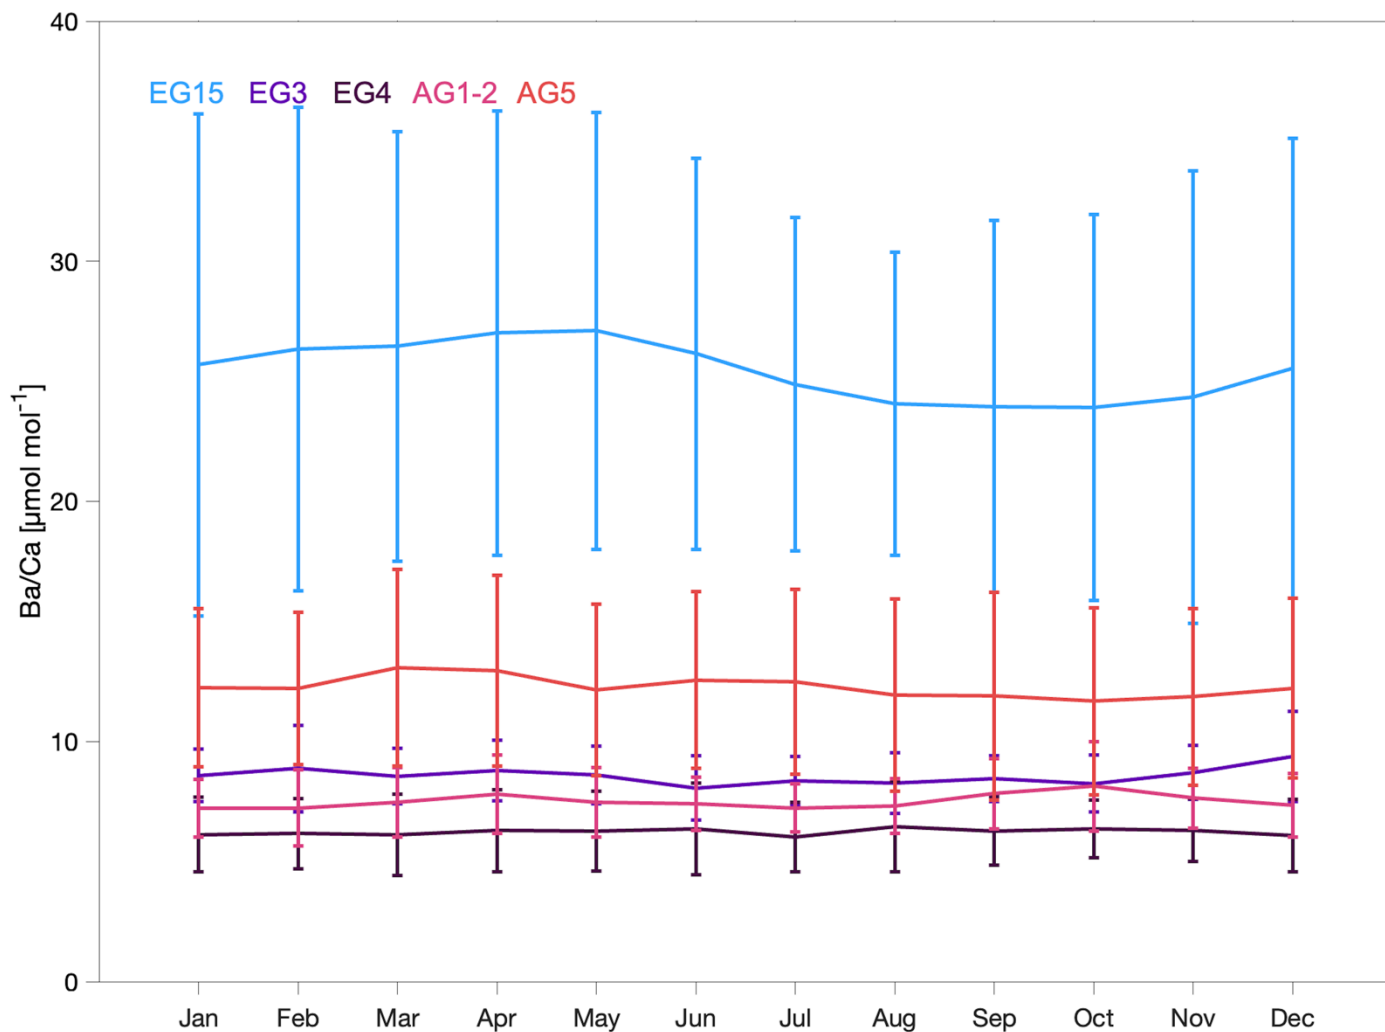

Fig S4. Monthly averages of all five Ba/Ca records. Monthly standard deviations shown as error bars.

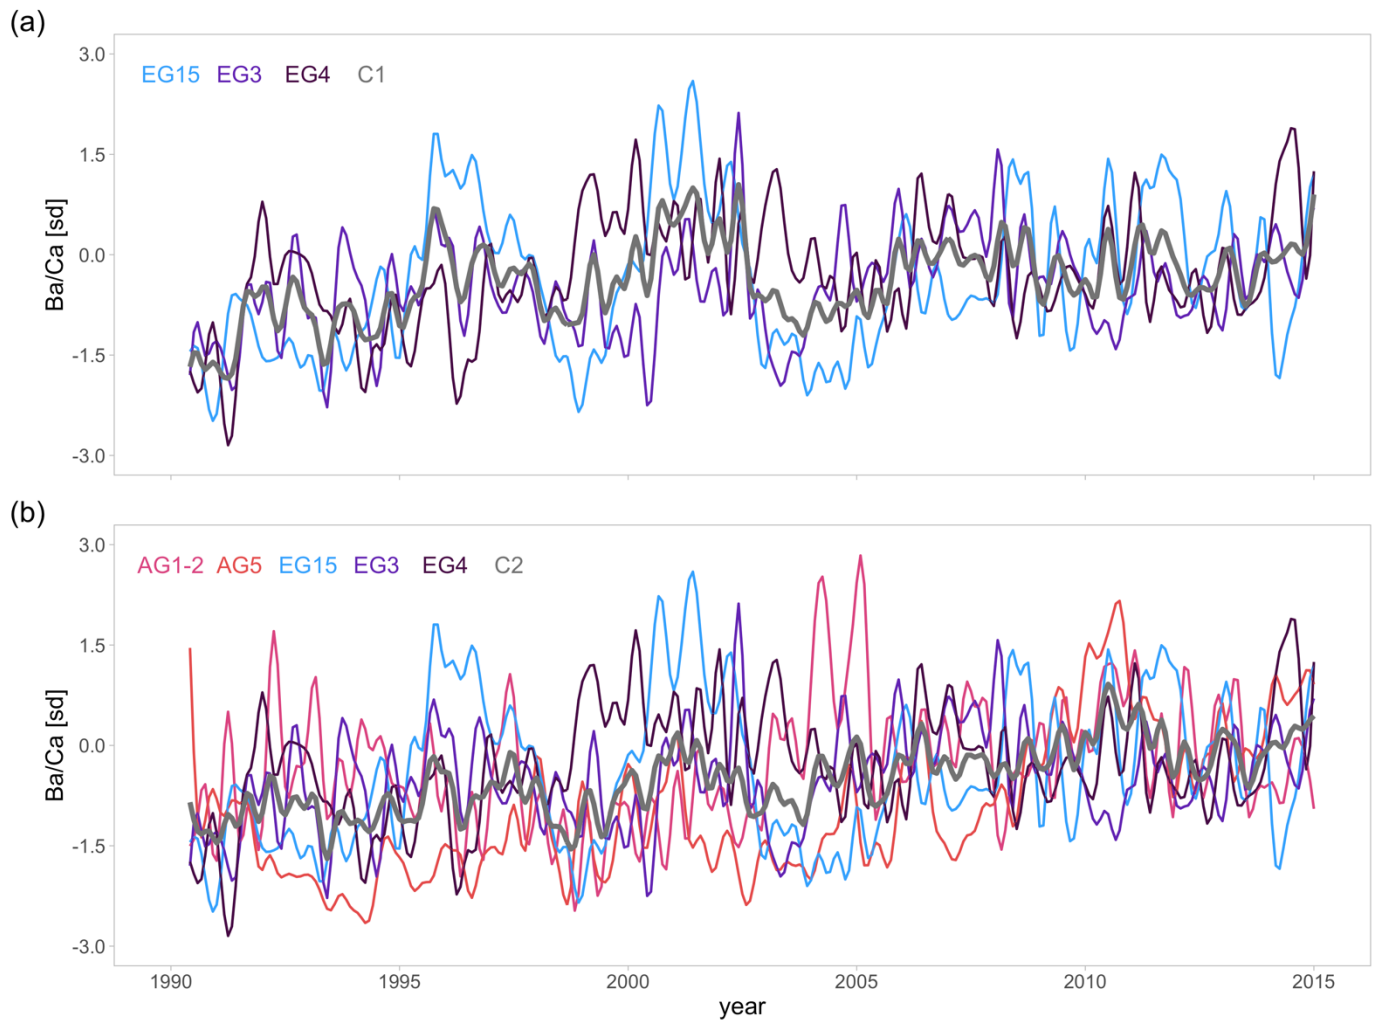

**Figure S4: Monthly interpolated Ba/Ca composites time series (filtered using a low pass filter with a 5-month frequency cut off) as well as the records used for each one (a) EG15 in light blue, EG3 in purple, EG4 in dark purple, (b) AG1-2 in pink, AG5 in red and both C1 and C2 in grey.**

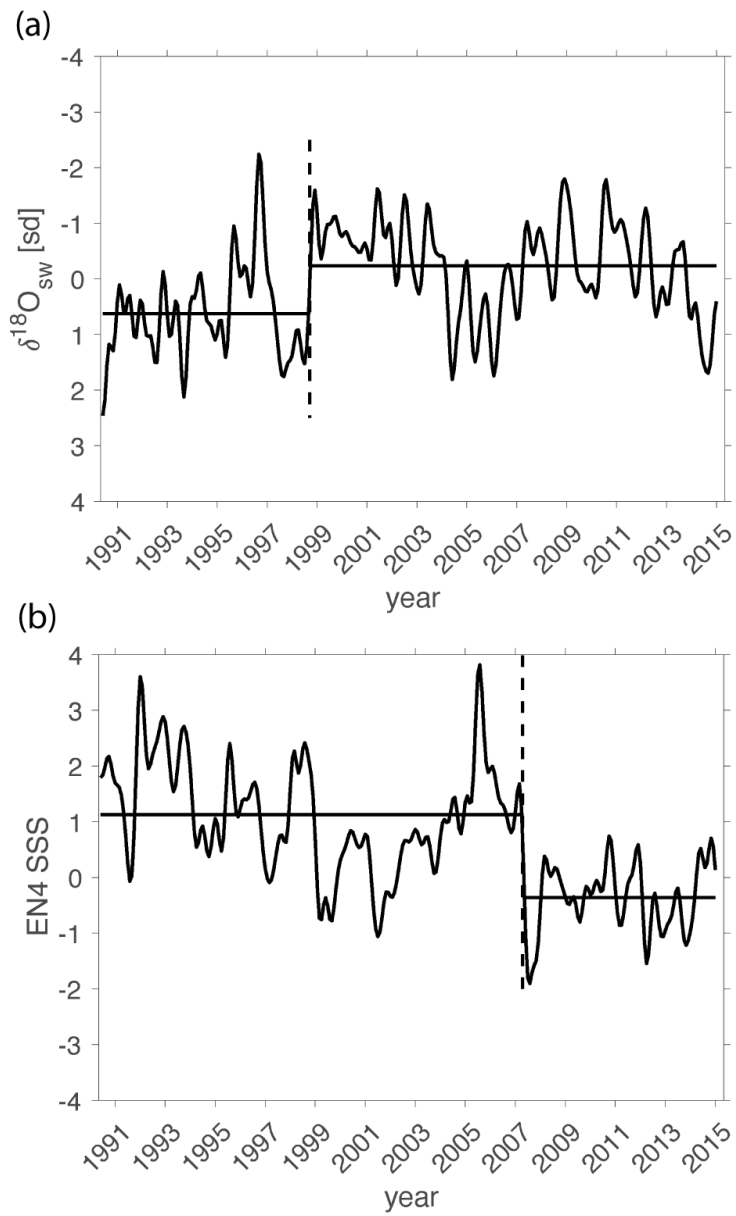

**Figure S5: Change point analysis based on significant arithmetic mean change (vertical dashed line) of (a) the  $\delta^{18}\text{O}_{\text{sw}}$  record from EG in 1998 and (b) the EN4 SSS record in 2007.**

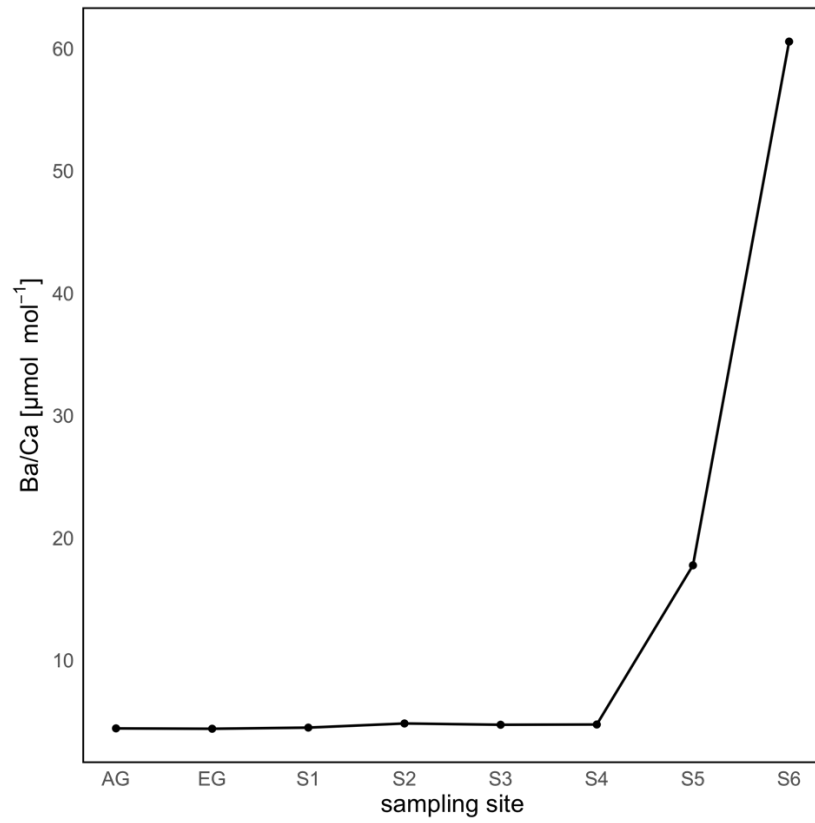

**Figure S6: Ba/Ca values of seawater across a transect from both coral colonies' sites and the Miri River located approximately 11 and 21 km away from Eve's Garden and Anemone's Garden, respectively.**

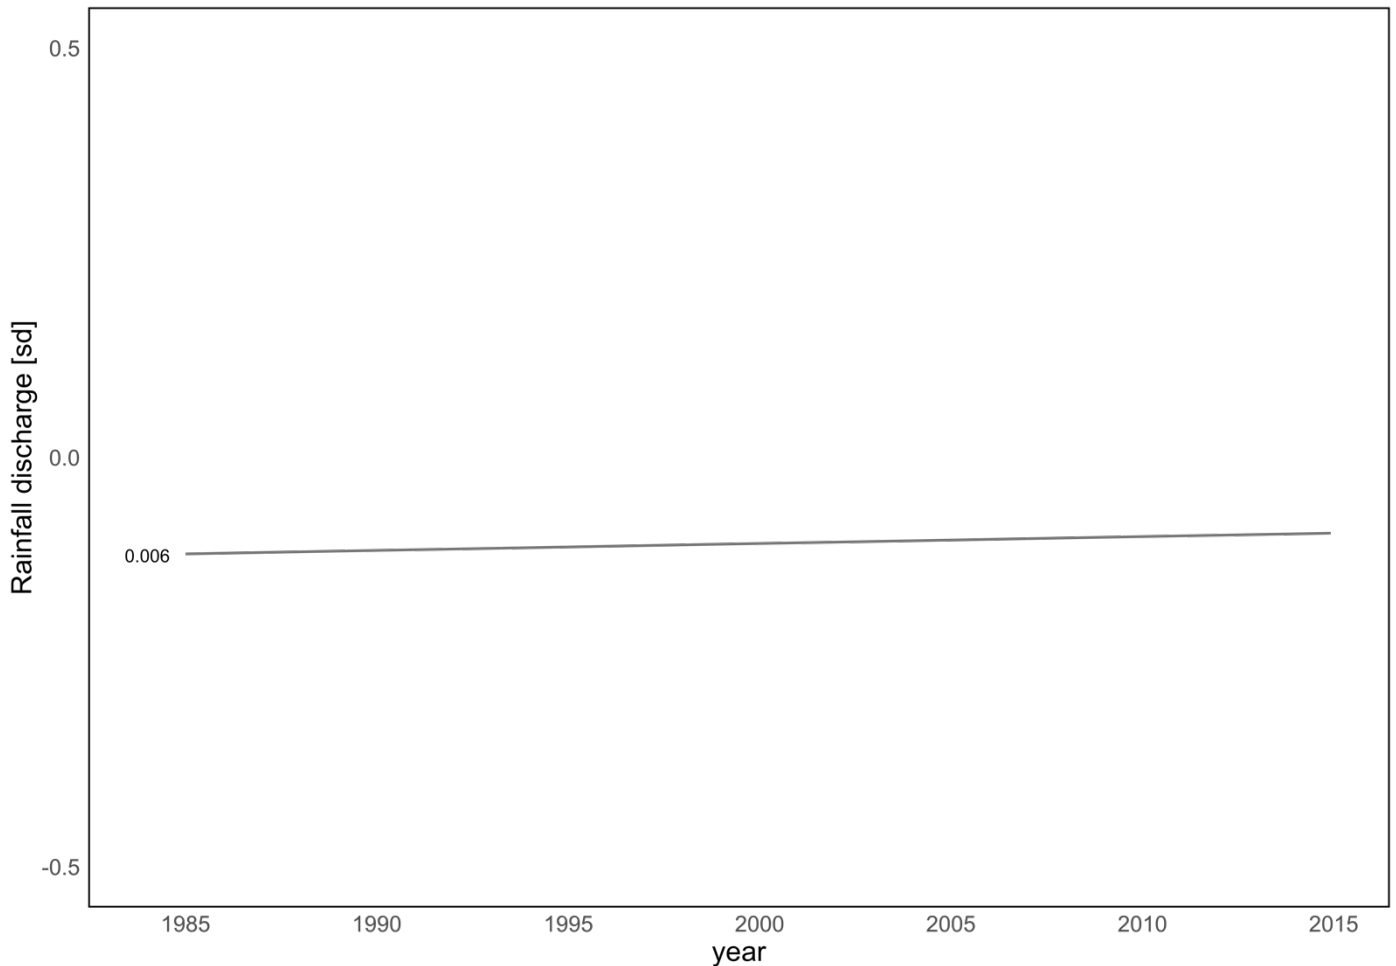

**Figure S7:** Trend in the rainfall average record of six stations throughout the catchment using Sen’s non-parametric method. The increasing trends are indicated by the Mann–Kendall tau–b statistic next to each record, results are not significant at the 0.05 level ( $p = 0.866$ ).

## Satellite imaging

To create the annual deforestation time-series for Sarawak, the Global Forest Change (GFC) dataset (Hansen et al., 2013) was projected into the local coordinate system (UTM 49 N, WGS 1984 – WKID 32649) and then clipped via the boundaries of a Baram catchment shapefile, within the GIS software ArcMap 10.8 (ESRI, 2022). The deforestation time-series was converted from a raster to a vector format and the shapefile table was exported as a csv to calculate deforestation area statistics using Python within the PyCharm IDE (JetBrains, 2022).

Below is the script used to calculate annual deforestation and to plot them in a bar graph as well as the corresponding map.

### Listing 1: Python code for deforestation graph and map

```
# import libraries# system
commands import os

# data manipulation import pandas as
pd import geopandas as gpdimport
numpy as np import rasterio
from rasterio.plot import show
```

```
from rasterio.plot import show_hist
import rasterstats
```

```
# graphing
```

```
import matplotlib.pyplot as plot
```

```
from mpl_toolkits.axes_grid1 import make_axes_locatable
```

```
import seaborn
```

```
import contextily as ctx
```

```
# specify and change directory
```

```
Dir = r'C:\Sarawak\datasets'
os.chdir(Dir)
)
```



```

# read in shapefiles
gfc_shapefile = gpd.read_file(' _
    gfc_2001_2019_baram_32649_vector_ErasedRivers.shp'
    ).drop(['Shape_Leng', 'Id', '
        OBJECTID'], axis = 1)

rivers_shapefile = gpd.read_file(' _
    hotosm_mys_waterways_Baram_32649.shp')
basin_shapefile = gpd.read_file('Baram River Basin.shp')

# read in raster
# this is used as a forest basemap in the map
raster = rasterio.open('GFC_2000_TreeCover_Baram_3857_nodata_
    .tif')

# read in as csv for graphing
rivers = r'gfc_2001_2019_Baram_32649_vector1KmRiver.csv'whole_basin = r'
    gfc_2001_2019_Baram_32649_vector_ErasedRivers.csv'

# all basin deforestation graph

# convert m2 to km2
gfc_shapefile['areakm2'] = gfc_shapefile['aream2'] / (1000 *
    1000)

bar = seaborn.barplot(x = gfc_shapefile['gridcode'], y =gfc_shapefile[
    'areakm2'], data = gfc_shapefile ,
    ci = None,
    estimator = np.sum,
    facecolor = 'white',

```

```

        edgecolor = 'black'
    )

plot.xticks(rotation = 30)
plot.xlabel('Year', weight = 'bold')
plot.ylabel('Deforestation Area (Km2)', weight = 'bold'
)
plot.title('Deforestation within Sarawak Baram River
Catchment, Malaysia')
plot.tight_layout()

Dir = r'C:\Sarawak\outputs\os.chdir
(Dir)
plot.savefig(
    fname = 'graph.png',dpi =
    1200,
    format = 'png'
)
plot.show()

# map creation

fig, ax = plot.subplots(1)

# convert dfs to 3857 prj to overlay with contextily basemap prj
gfc_shapefilePrj = gfc_shapefile.to_crs(epsg = 3857)
rivers_shapefilePrj = rivers_shapefile.to_crs(epsg = 3857)
basin_shapefilePrj = basin_shapefile.to_crs(epsg = 3857)

# add categorical class to df so matplotlib cmap accepts forl
    egend
    -
    -
    -

```

```

rivers_shapefilePrj['class'] = 'Baram basin _ _ rivers'
#footwork for neater fitting colour ramp
divider = make_axes_locatable(ax)
cax = divider.append_axes('bottom', size = '5%', pad = 0.2)

# rivers
rivers_shapefilePrj.plot(column = 'class',
                           ax = ax,
                           legend = True, cmap = '
                           cool',
                           linewidth = 0.6,
                           zorder = 4)

# basemap for area outside of Baram Basin
ctx.add_basemap(ax = ax,
                 source = ctx.providers.CartoDB.Voyager, zorder = 1)

# forest cover
rasterio.plot.show(raster,
                   ax = ax,
                   cmap = 'Greens', zorder = 3,
                   ,
                   alpha = 0.5)

# deforestation
gfc_shapefilePrj.plot(column = 'gridcode',
                       ax = ax,
                       cax = cax,
                       legend = True,
                       legend_kwds = {'label': 'Annualde _
                                       forestation',

```

```

        'orientation': 'horizontal',
        'shrink': 0.8, 'pad': 0.04},
    cmap = 'plasma', zorder = 5)

# Baram basin outline
basin_shapefilePrj.plot(ax = ax,
                        facecolor = 'none', edgecolor
                        = 'black', zorder = 2)

ax.set_xlabel('')
ax.set_ylabel('')

plot.suptitle('Deforestation within the Baram River Basin, Malaysia', y=
0.95)

Dir = r'C:\Sarawak\outputs'
os.chdir(Dir)
plot.savefig(
    fname = 'map.png',
    dpi = 1200, format = 'png')

plot.show()

```
