# Supplementary material for: Massive corals record deforestation in Malaysian Borneo through sediments in river discharge
Source: Copernicus journal article supplement (doi:10.5194/bg-2022-235), 2023-01-04

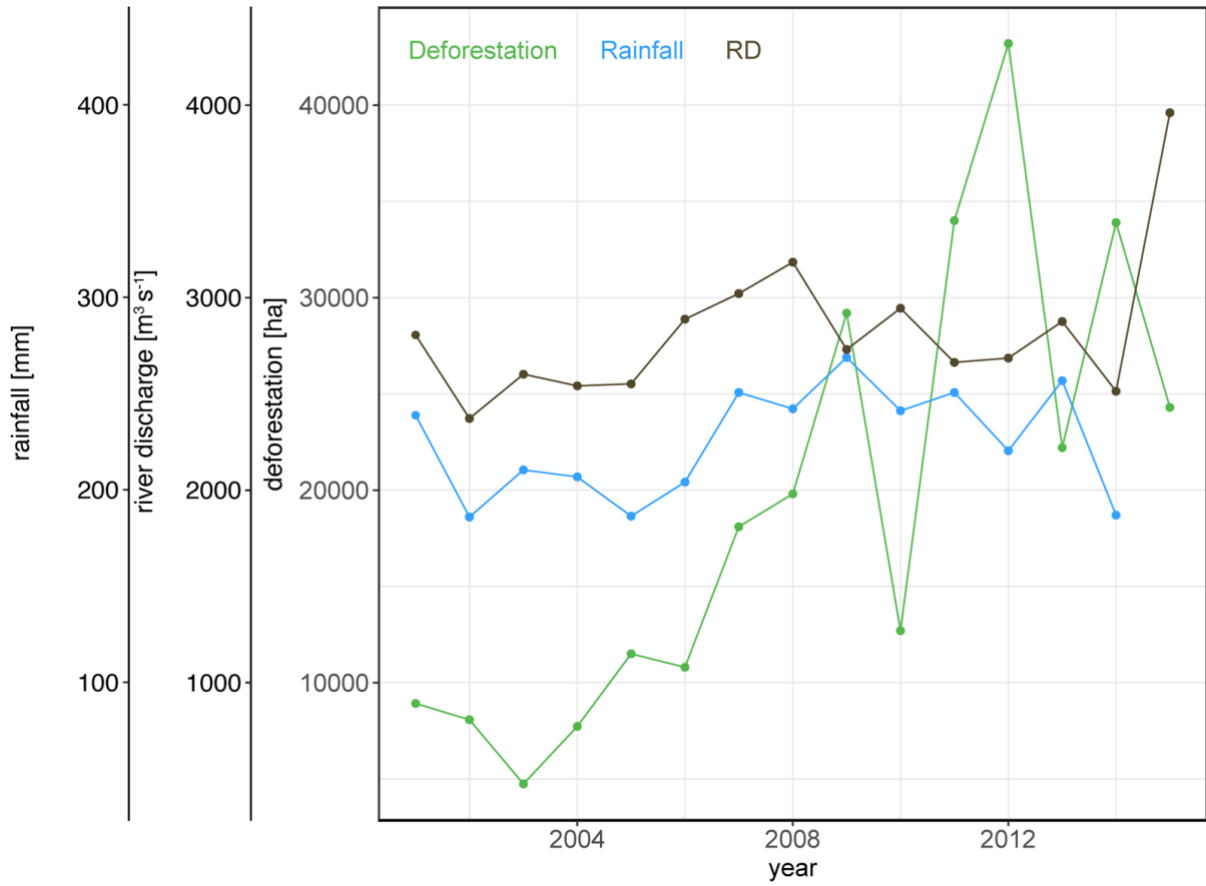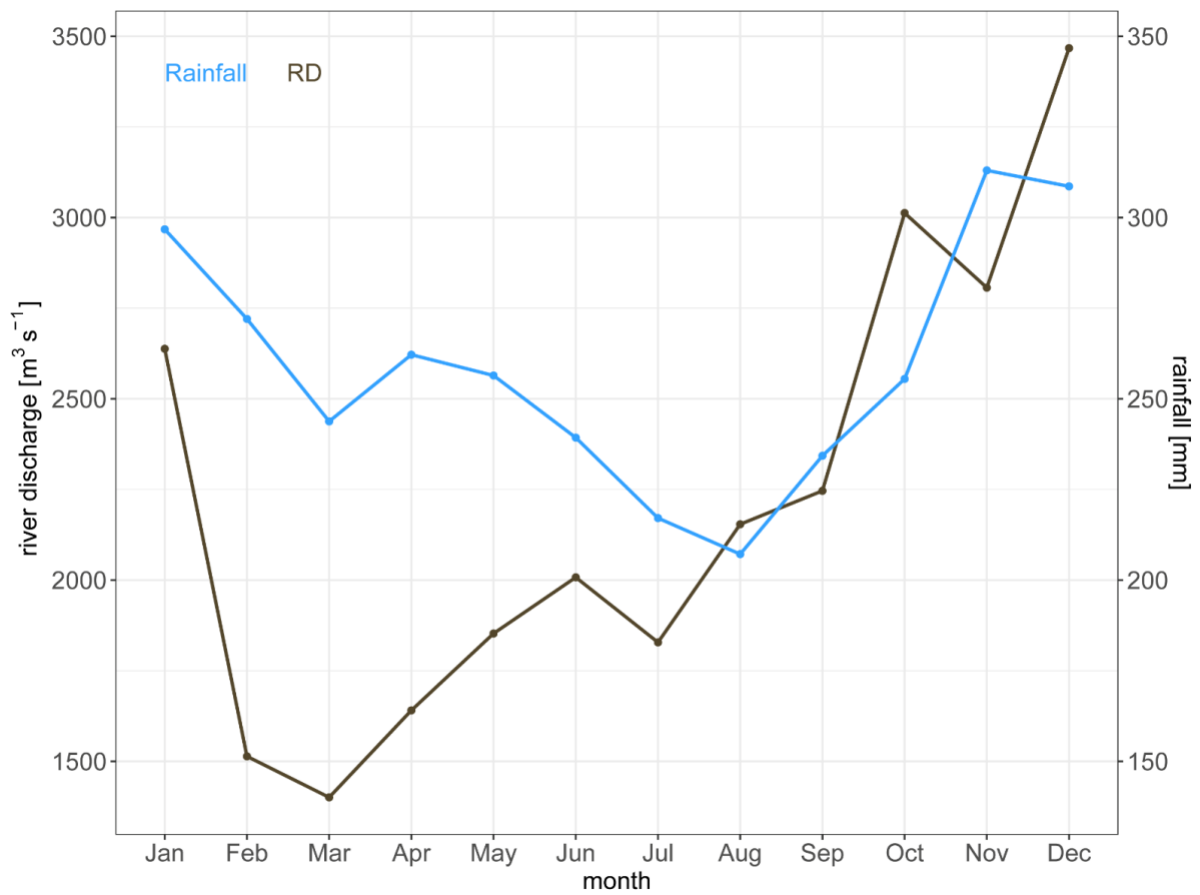

Supplement: Supplementary file [file bg-2022-235-AC1-supplement.pdf]
